# Supplementary material
Source: MDPI journal article supplement (https://www.mdpi.com/2073-4344/12/9/1021)
Supplement: s1 [file s1]

Supporting information for

# **Defect engineering and surface polarization of TiO<sub>2</sub> nanorod arrays toward efficient photoelectrochemical oxygen evolution**

**Yueying Li<sup>1, a, \*</sup>, Shiyu Liang<sup>2, a</sup>, Huanhuan Sun<sup>2</sup>, Wei Hua<sup>2</sup>, Jian-Gan Wang<sup>2, \*</sup>**

<sup>1</sup> New Energy (Photovoltaic) Industry Research Center, Qinghai University, No. 251 Daning Road, Xining 810016, China

<sup>2</sup> State Key Laboratory of Solidification Processing, Center for Nano Energy Materials, School of Materials Science and Engineering,

Northwestern Polytechnical University and Shaanxi Joint Lab of Graphene (NPU), No. 127, Youyi West Road, Xi'an 710072, China

<sup>a</sup>. These authors contributed equally to this work.

\*Corresponding authors: liyy2019@qhu.edu.cn (Y. Li); wangjiangan@nwpu.edu.cn (J.-G. Wang).

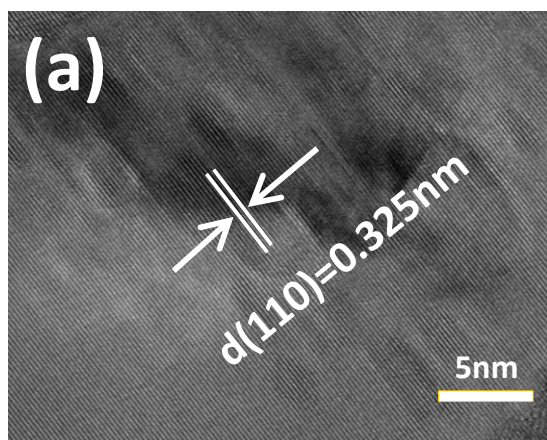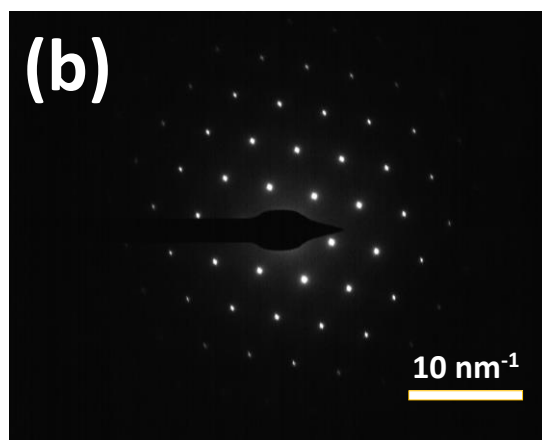

**Figure S1.** (a) HRTEM and (b) SAED pattern of TiO<sub>2</sub>.

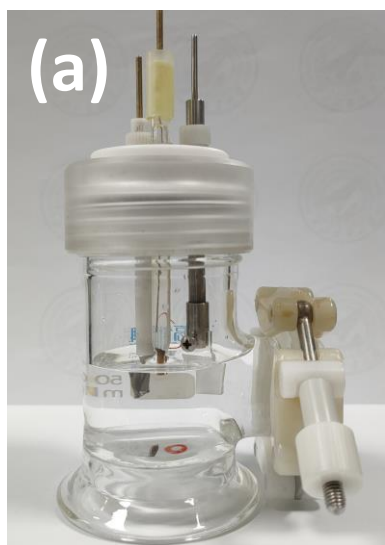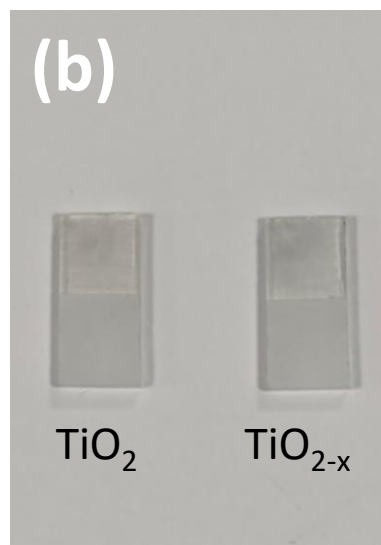

**Figure S2.** Digital images of (a) the electrochemical cell and (b) as-prepared  $\text{TiO}_2$  and  $\text{TiO}_{2-x}$  samples.

**Table S1.** Comparison of PEC performance for TiO<sub>2</sub>-based photoelectrodes.

| Sample                                                                                | Light source<br>(mW·cm <sup>-2</sup> ) | Electrolyte (pH)                          | j (mA cm <sup>-2</sup> ) at 1.23 V |        | Ref.         |
|---------------------------------------------------------------------------------------|----------------------------------------|-------------------------------------------|------------------------------------|--------|--------------|
|                                                                                       |                                        |                                           | vs. RHE                            |        |              |
|                                                                                       |                                        |                                           | Bare                               | Sample |              |
| TiO <sub>2</sub> /NH <sub>2</sub> -<br>MIL(Fe <sub>0.25</sub> Ni <sub>0.75</sub> )-88 | 100                                    | 0.5M PBS (7)                              | 0.6                                | 1.56   | [1]          |
| CQDs/E-TiO <sub>2</sub>                                                               | 100                                    | 0.2 M Na <sub>2</sub> SO <sub>4</sub> (7) | 0.256                              | 2.55   | [2]          |
| UiO-67@TiO <sub>2</sub>                                                               | 100                                    | 1 M KOH (14)                              | 0.5                                | 2.38   | [3]          |
| LaCo(OH) <sub>x</sub> /Au/Sb-<br>TiO <sub>2</sub>                                     | 100                                    | 0.5 M Na <sub>2</sub> SO <sub>4</sub> (7) | 0.3                                | 2.0    | [4]          |
| Gly-TiO <sub>2</sub>                                                                  | 100                                    | 1M NaOH (13.6)                            | 0.6                                | 1.41   | [5]          |
| 1-Bi/TiO <sub>2</sub>                                                                 | 100                                    | 0.05 M PBS (7)                            | 0.4                                | 1.65   | [6]          |
| TiO <sub>2</sub> /STO/CdS NRs                                                         | 100                                    | 0.35M Na <sub>2</sub> SO <sub>3</sub>     | 0.25                               | 1.85   | [7]          |
|                                                                                       |                                        | and 0.25 M Na <sub>2</sub> S<br>(12.5)    |                                    |        |              |
| NiFe-MOF/TiO <sub>2</sub>                                                             | 100                                    | 0.5 M Na <sub>2</sub> SO <sub>4</sub>     | 0.3                                | 0.77   | [8]          |
|                                                                                       |                                        | (6.8)                                     |                                    |        |              |
| PCN/Cu-TNA                                                                            | 100                                    | 0.2 M Na <sub>2</sub> SO <sub>3</sub>     | 0.5                                | 1.42   | [9]          |
|                                                                                       |                                        | (10.2)                                    |                                    |        |              |
| r-TiO <sub>2</sub> /a-TiO <sub>2</sub> /ZnFe-<br>LDH                                  | 100                                    | 0.1 M Na <sub>2</sub> SO <sub>4</sub>     | 0.73                               | 1.86   | [10]         |
|                                                                                       |                                        | (6.8)                                     |                                    |        |              |
| Sn <sub>3</sub> O <sub>4</sub> /TiO <sub>2</sub> /Au                                  | 100                                    | 0.1 M NaOH                                | 0.6                                | 2.5    | [11]         |
|                                                                                       |                                        | (13.6)                                    |                                    |        |              |
| TiO <sub>2-x</sub> NRAs                                                               | 100                                    | 0.2 M Na <sub>2</sub> SO <sub>4</sub> (7) | 0.81                               | 1.68   | [12]         |
| MnO <sub>2</sub> /N-TiO <sub>2</sub> NTs                                              | 100                                    | 1M NaOH (13.9)                            | 0.57                               | 1.95   | [13]         |
| VO/Ti-Si-O NTs                                                                        | 100                                    | 1 M KOH (13.6)                            | 0.3                                | 1.63   | [14]         |
| TiO <sub>2-x</sub> NTAs                                                               | 100                                    | 1M NaOH (13.9)                            | 0.2                                | 0.73   | [15]         |
| TiO <sub>2-x</sub>                                                                    | 100                                    | 1 M NaOH (13.9)                           | 1.5                                | 2.62   | This<br>work |

**Table S2.** The fitted values of Nyquist plots according to the equivalent circuit in Figure 5c.

|                    | <b><math>R_s</math> (<math>\Omega \text{ cm}^{-2}</math>)</b> | <b><math>R_{ct1}</math> (<math>\Omega \text{ cm}^{-2}</math>)</b> | <b><math>R_{ct2}</math> (<math>\Omega \text{ cm}^{-2}</math>)</b> |
|--------------------|---------------------------------------------------------------|-------------------------------------------------------------------|-------------------------------------------------------------------|
| TiO <sub>2</sub>   | 9.04                                                          | 139.9                                                             | 767.5                                                             |
| TiO <sub>2-x</sub> | 5.3                                                           | 17.48                                                             | 90.5                                                              |

## References

1. Yoon, J. W.; Kim, J.-H.; Jo, Y.-M.; Lee, J.-H. Heterojunction between bimetallic metal-organic framework and TiO<sub>2</sub>: Band-structure engineering for effective photoelectrochemical water splitting, *Nano Research* **2022**.
2. Zhou, T.; Li, L.; Li, J.; Wang, J.; Bai, J.; Xia, L.; Xu, Q.; Zhou, B. Electrochemically reduced TiO<sub>2</sub> photoanode coupled with oxygen vacancy-rich carbon quantum dots for synergistically improving photoelectrochemical performance, *Chem. Eng. J.* **2021**, *425*, 131770.
3. Wang, X.; Sun, W.; Tian, Y.; Dang, K.; Zhang, Q.; Shen, Z.; Zhan, S. Conjugated pi electrons of MOFs drive charge separation at heterostructures interface for enhanced photoelectrochemical water oxidation, *Small* **2021**, *17*, 2100367.
4. Pal, D.; Sarkar, A.; Ghosh, N. G.; Sanke, D. M.; Maity, D.; Karmakar, K.; Sarkar, D.; Zade, S. S.; Khan, G. G. Integration of LaCo(OH)<sub>x</sub> photo-electrocatalyst and plasmonic gold nanoparticles with Sb-doped TiO<sub>2</sub> Nanorods for photoelectrochemical water oxidation, *ACS Appl. Nano Mater.* **2021**, *4*, 6111-6123.
5. Ma, W.; Huang, K.; Wu, X.; Wang, M.; Feng, S. Surface polarization enables high charge separation in TiO<sub>2</sub> nanorod photoanode, *Nano Research* **2021**, *14*, 4056-4062.
6. Pang, Y.; Zang, W.; Kou, Z.; Zhang, L.; Xu, G.; Lv, J.; Gao, X.; Pan, Z.; Wang, J.; Wu, Y. Assembling of Bi atoms on TiO<sub>2</sub> nanorods boosts photoelectrochemical water splitting of semiconductors, *Nanoscale* **2020**, *12*, 4302-4308.
7. He, Y.; Zhu, J.; Yuan, Y.; Li, M.; Yang, Y.; Liu, Y.; Chen, M.; Cao, D.; Yan, X. Dual-regulation charge separation strategy with the synergistic effect of 1D/0D heterostructure and inserted ferroelectric layer for boosting photoelectrochemical water oxidation, *J. Mater. Chem. A* **2021**, *9*, 7594-7605.
8. Cui, W.; Bai, H.; Shang, J.; Wang, F.; Xu, D.; Ding, J.; Fan, W.; Shi, W. Organic-inorganic hybrid-photoanode built from NiFe-MOF and TiO<sub>2</sub> for efficient PEC water splitting, *Electrochim. Acta* **2020**, *349*, 136383.
9. Wang, L.; Si, W.; Ye, Y.; Wang, S.; Hou, F.; Hou, X.; Cai, H.; Dou, S. X.; Liang, J. Cu-Ion-Implanted and Polymeric Carbon Nitride-Decorated TiO<sub>2</sub> Nanotube Array for Unassisted Photoelectrochemical Water Splitting, *ACS Appl. Mater. Interfaces* **2021**, *13*, 44184-44194.
10. Zhang, S.; Liu, Z.; Chen, D.; Guo, Z.; Ruan, M. Oxygen vacancies engineering in TiO<sub>2</sub> homojunction/ZnFe-LDH for enhanced photoelectrochemical water oxidation, *Chem. Eng. J.* **2020**, *395*, 125101.
11. Dong, G.; Cheng, X.; Bi, Y. Hierarchical TiO<sub>2</sub> photoanodes with spatial charge separation for efficient oxygen evolution reaction, *Solar RRL* **2020**, *5*, 2000449.
12. Huang, C.; Bian, J.; Guo, Y.; Huang, M.; Zhang, R.-Q. Thermal vacuum de-oxygenation and post oxidation of TiO<sub>2</sub> nanorod arrays for enhanced photoelectrochemical properties, *J. Mater. Chem. A* **2019**, *7*, 5434-5441.
13. Cheng, X.; Dong, G.; Zhang, Y.; Feng, C.; Bi, Y. Dual-bonding interactions between MnO<sub>2</sub> cocatalyst and TiO<sub>2</sub> photoanodes for efficient solar water splitting, *Appl. Catal. B: Environ.* **2020**, *267*, 118723.
14. Dong, Z.; Cai, Y.; Zhang, K.; Chu, Z.; Han, S.; Li, Z. Electrochemical reduction induced self-doping of oxygen vacancies into Ti-Si-O nanotubes as efficient photoanode for boosted photoelectrochemical water splitting, *Int. J. Hydrogen Energy* **2021**, *46*, 3554-3564.
15. Kang, Q.; Cao, J.; Zhang, Y.; Liu, L.; Xu, H.; Ye, J. Reduced TiO<sub>2</sub> nanotube arrays for photoelectrochemical water splitting, *J. Mater. Chem. A* **2013**, *1*, 5766-5774.
